# Supplementary material
Source: PubMed Central journal article supplement (PMC2790486)

A

Fitted parameters for  $\alpha$ Syn aggregation

|                             | $t_{1/2}$ (h) | $K_{app}$ (h <sup>-1</sup> ) | Lag (h)      | ThT <sub>50h</sub> (A.U.) |
|-----------------------------|---------------|------------------------------|--------------|---------------------------|
| $\alpha$ Syn                | 19.7 +/- 5.3  | 0.51 +/- 0.32                | 15.8 +/- 6.8 | 2884 +/- 374              |
| $\alpha$ Syn+Hsp70 1/10     | N/D           | N/D                          | N/D          | 138 +/- 28                |
| $\alpha$ Syn+ATP            | 13.9 +/- 0.6  | 0.73 +/- 0.12                | 11.2 +/- 1.0 | 3008 +/- 496              |
| $\alpha$ Syn+ATP+Hsp70 1/40 | 21.9 +/- 0.2  | 0.22 +/- 0.04                | 12.8 +/- 1.5 | 2602 +/- 123              |
| $\alpha$ Syn+ATP+Hsp70 1/10 | 36.5 +/- 2.2  | 0.26 +/- 0.04                | 28.7 +/- 3.2 | 2285 +/- 321              |
| $\alpha$ Syn+ATP+Hsp70 1/8  | 49.6 +/- 3.0  | 0.13 +/- 0.01                | 34.1 +/- 3.6 | 1591 +/- 373              |
| $\alpha$ Syn+ATP+Hsp70 1/4  | N/D           | N/D                          | N/D          | 318 +/- 17                |

B

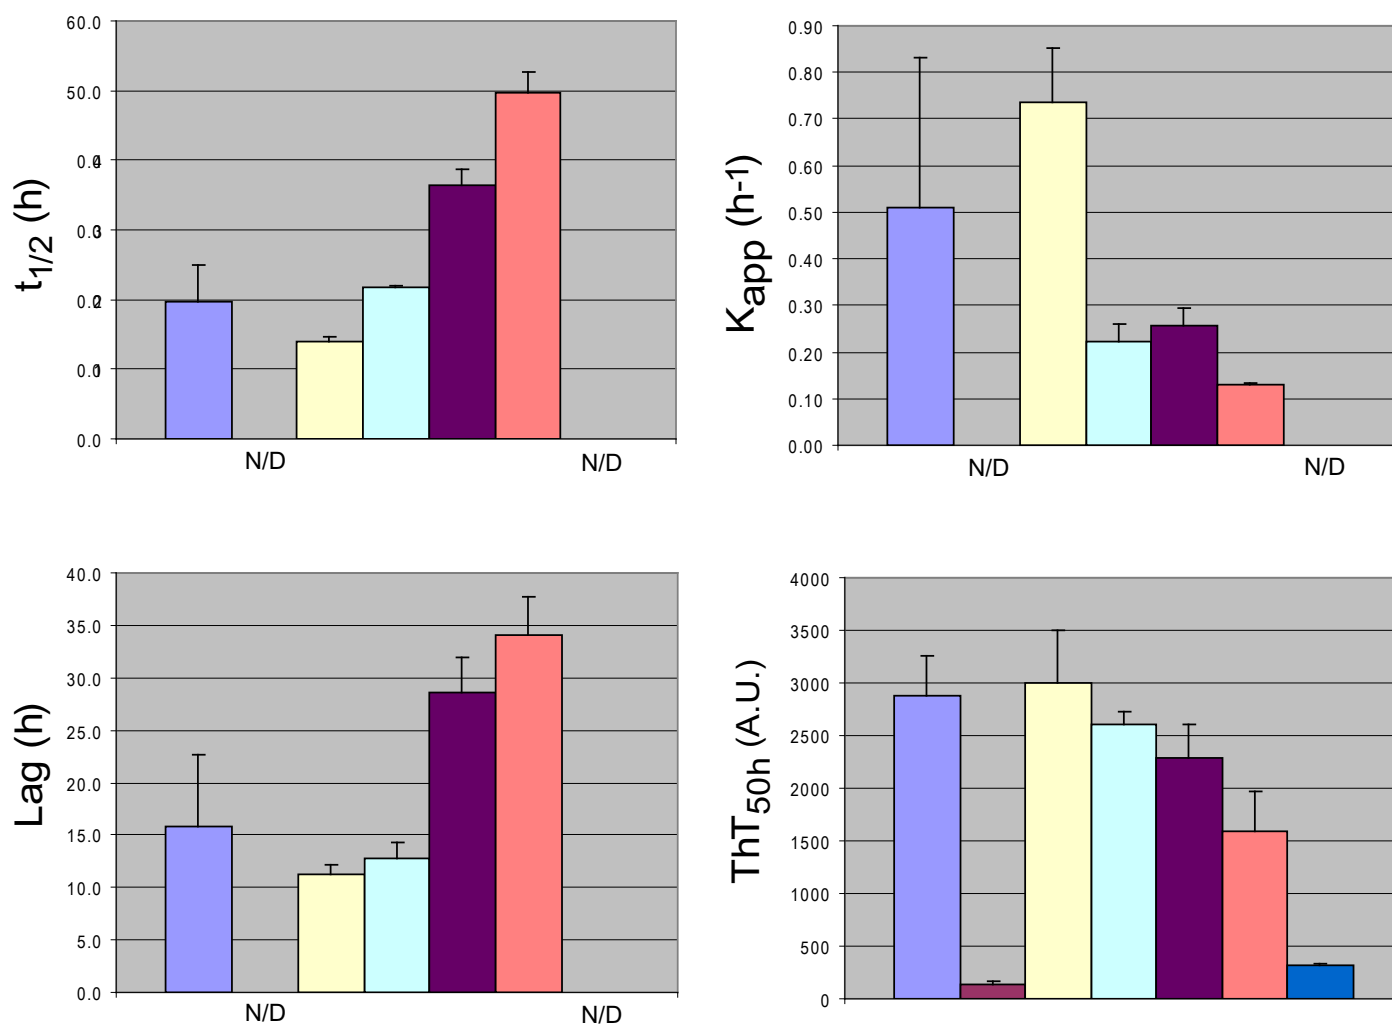

Supplement: emboj2009298s2.pdf [file emboj2009298s2.pdf]
