# Supplementary material
Source: PubMed Central journal article supplement (PMC2790486)
Supplement: emboj2009298s8.pdf [file emboj2009298s8.pdf]

Manuscript EMBO-2009-72270

## **Chaperone Proteostasis in Parkinson's Disease: Stabilization of the Hsp70/ $\alpha$ -synuclein Complex by Hip**

Carlos W. Bertocini, August Andersson, Annemieke T. van der Goot, Shang-Te D. Hsu, Rafael Fernández-Montesinos, Jannie de Jong, Tjakko J. van Ham, Ellen A. A. Nollen, David Pozo, John Christodoulou, Christopher M. Dobson

*Corresponding author: Cintia Roodveldt, University of Cambridge*

---

### **Review timeline:**

Submission date:

18 August 2009

Accepted:

15 September 2009

---

### **Transaction Report:**

An earlier version of this manuscript was submitted to *The EMBO Journal* and assessed before January 2009. As the original review of the manuscript therefore predates the implementation of *The EMBO Journal's* transparent review process policy, no Review Process File is available with this article.
