# Supplementary material
Source: PubMed Central journal article supplement (PMC2790486)

**A**

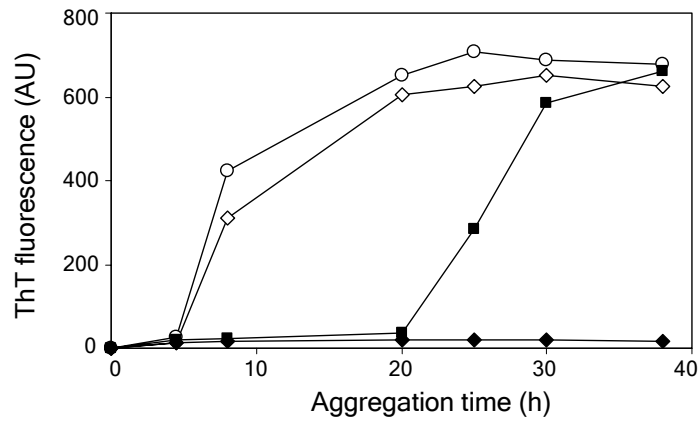

**B**

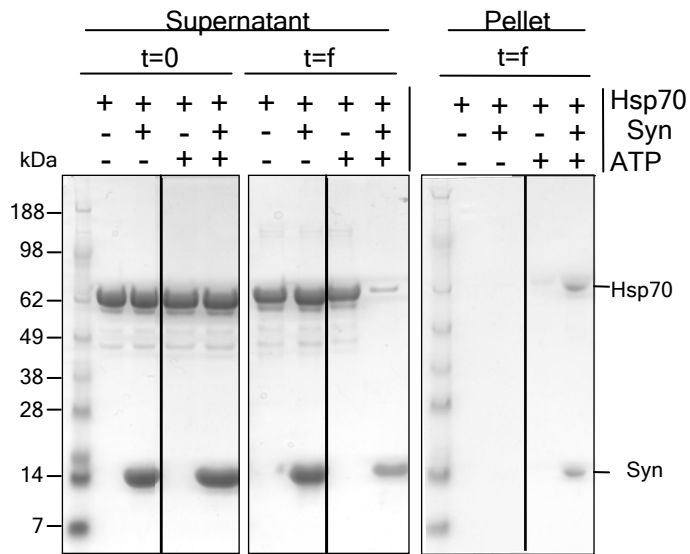

**C**

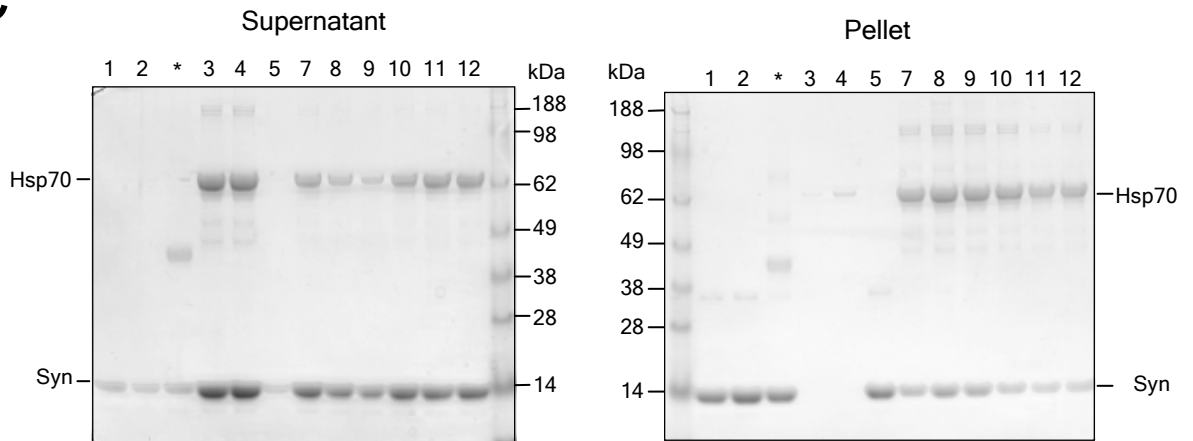

Supplement: emboj2009298s3.pdf [file emboj2009298s3.pdf]

**A**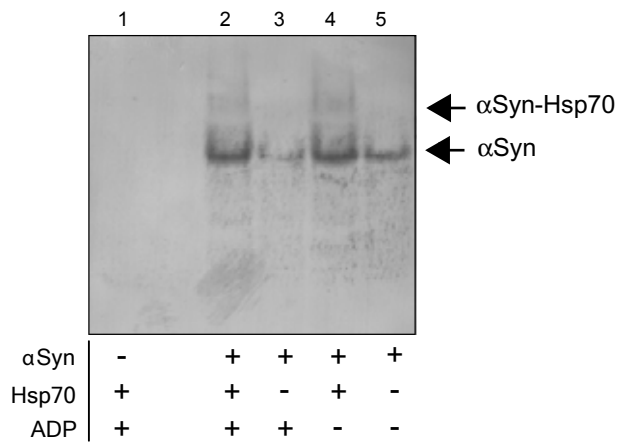**B**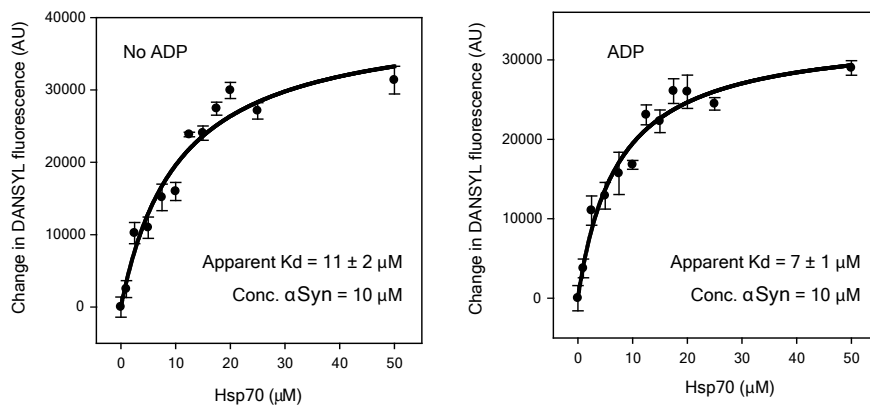**C**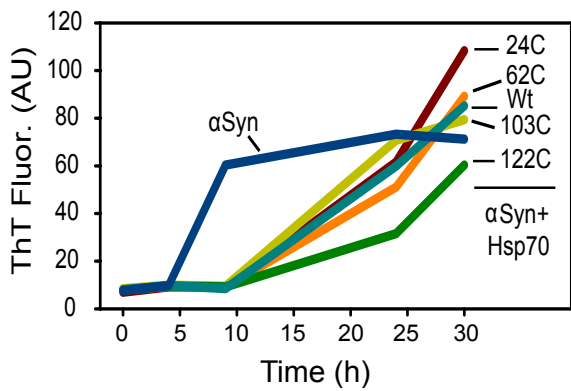**D**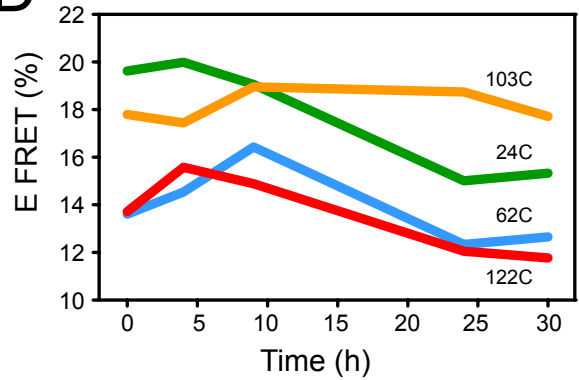**E**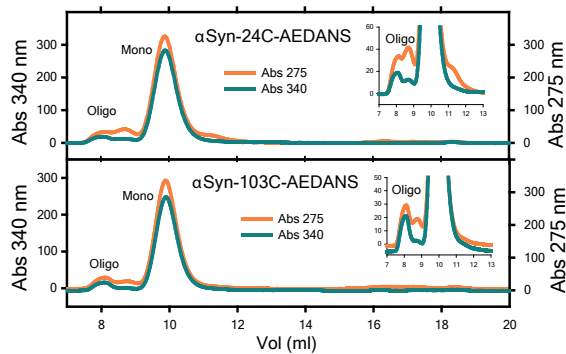**F**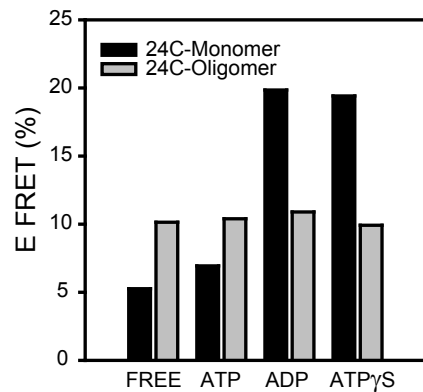

Supplement: emboj2009298s4.pdf [file emboj2009298s4.pdf]

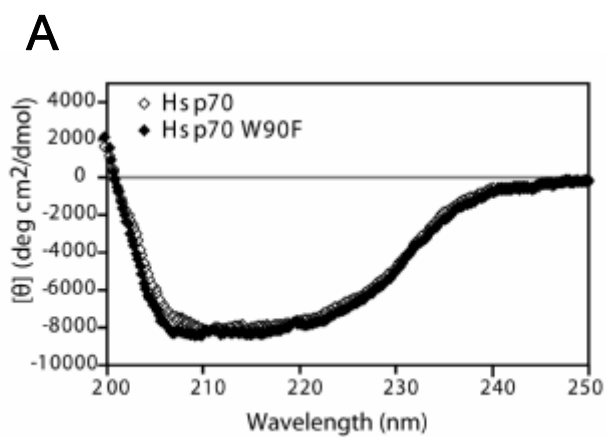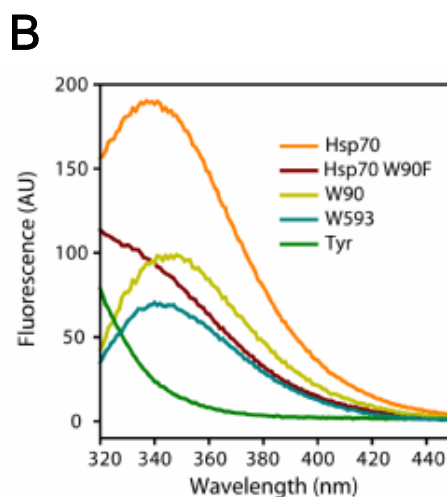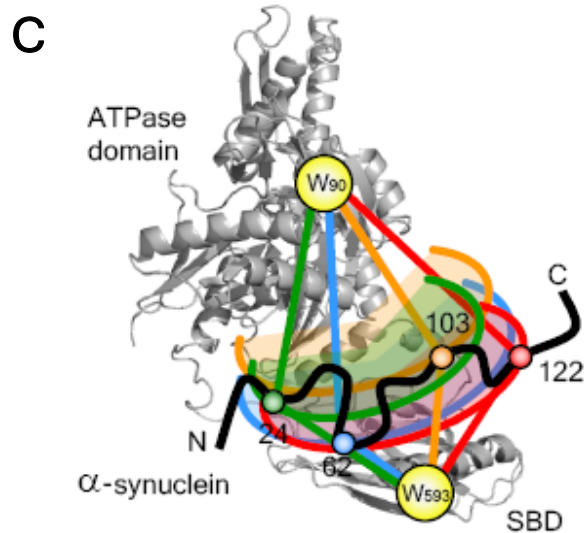

| Nucleotide-free (Å) |      |      |
|---------------------|------|------|
| Pos.                | W593 | W90  |
| ● 24                | 38   | > 50 |
| ● 62                | 39   | 39   |
| ● 103               | 28   | > 50 |
| ● 122               | 31   | 34   |

  

| ADP-bound (Å) |      |      |
|---------------|------|------|
| Pos.          | W593 | W90  |
| ● 24          | 29   | 33   |
| ● 62          | 27   | > 50 |
| ● 103         | 28   | 32   |
| ● 122         | 28   | 41   |

Supplement: emboj2009298s5.pdf [file emboj2009298s5.pdf]

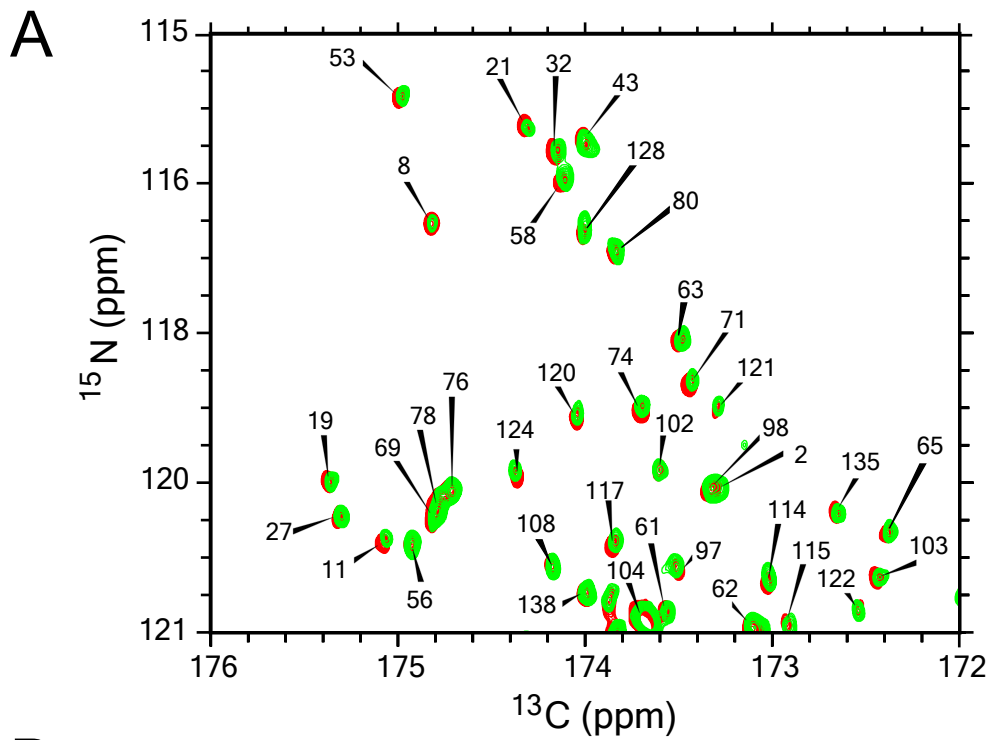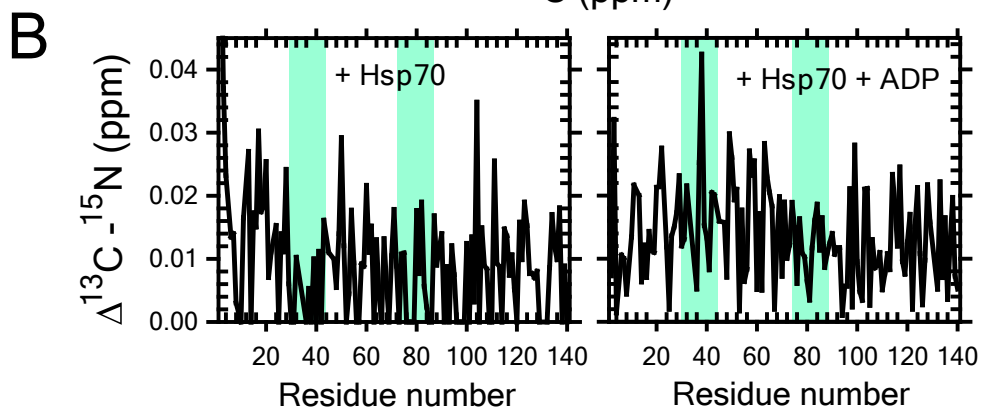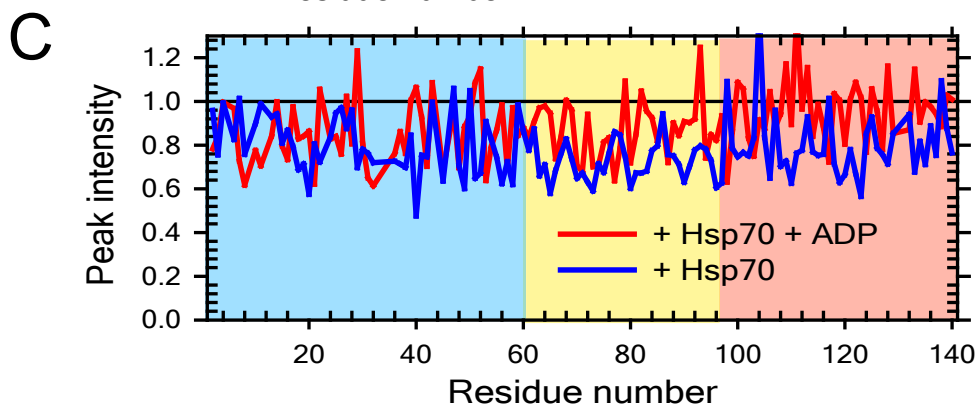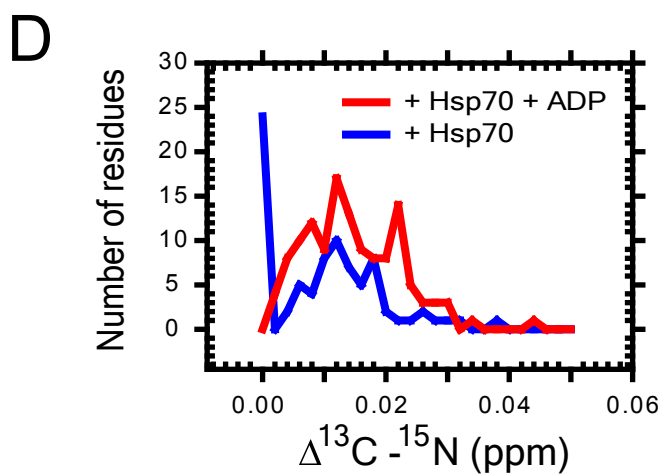

Supplement: emboj2009298s6.pdf [file emboj2009298s6.pdf]

**A**

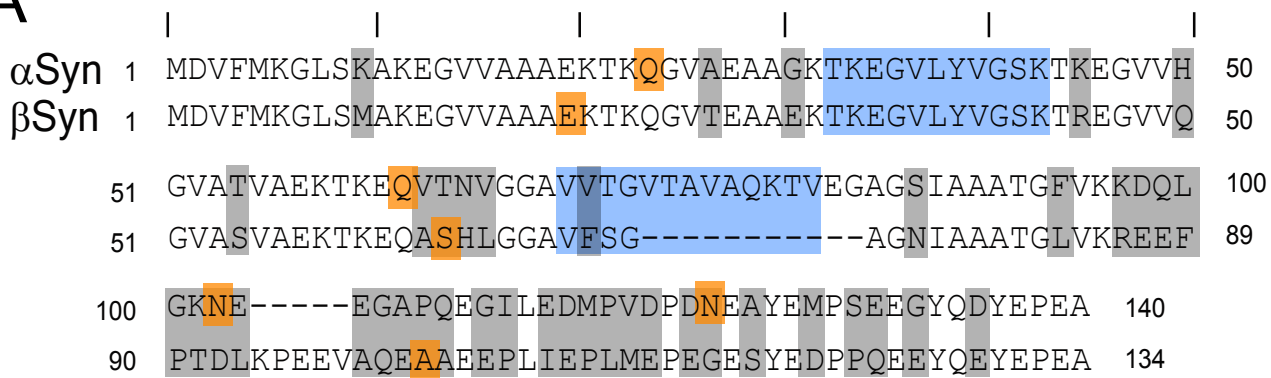

Predicted Hsp70 binding sites
  Cys replacements
  Non-conserved residues

**B**

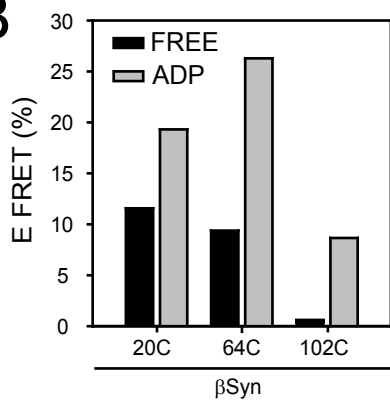

**C**

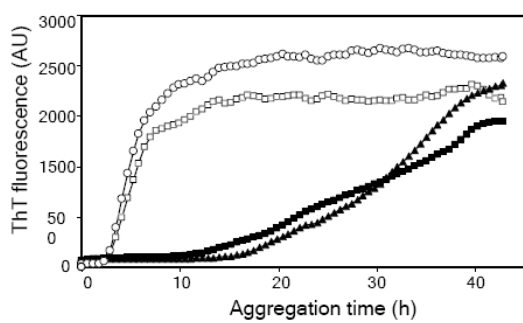

**D**

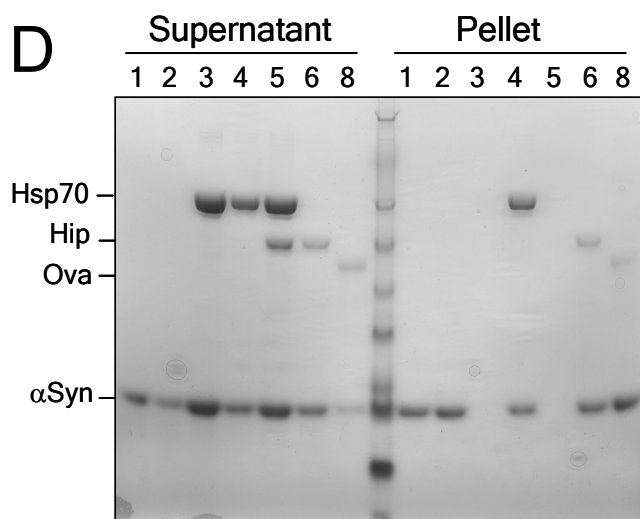

Supplement: emboj2009298s7.pdf [file emboj2009298s7.pdf]
